# Supplementary material for: HIV-1 Polymerase Inhibition by Nucleoside Analogs: Cellular- and Kinetic Parameters of Efficacy, Susceptibility and Resistance Selection
Source: PubMed Central journal article supplement (PMC3261923; doi:10.1371/journal.pcbi.1002359), 2012-01-19
Supplement: pcbi.1002359.s004.pdf [file pcbi.1002359.s004.pdf]

**Table S4. Pre-steady state kinetic constants for nucleoside incorporation by human mitochondrial polymerase- $\gamma$**

|        | $K_D$ $\mu\text{M}$ | $k_{\text{pol}}$ [ $\text{s}^{-1}$ ] | $r_{\text{exo}}$ [ $\text{s}^{-1}$ ] | ref.   |
|--------|---------------------|--------------------------------------|--------------------------------------|--------|
| dATP   | 0.8                 | 45                                   | -*                                   | [1]    |
| dTTP   | 0.6                 | 25                                   | -*                                   | [1]    |
| dCTP   | 0.8                 | 37                                   | -*                                   | [1]    |
| dGTP   | 0.9                 | 43                                   | -*                                   | [1]    |
| TFV-DP | 40.3                | 0.21                                 | 0.0007                               | [2]    |
| AZT-TP | 187                 | 0.2                                  | 0.0004                               | [2]    |
| D4T-TP | 0.045               | 0.24                                 | 0.0004                               | [2]    |
| FTC-TP | 62.9                | 0.0086                               | 0.0048                               | [3, 4] |
| 3TC-TP | 9.2                 | 0.125                                | 0.015                                | [2]    |
| CBV-TP | 13                  | 0.0018                               | 0.0016                               | [2]    |

\*  $r_{\text{pyro}}$  was set to value zero because of insufficient information.

## References

1. Johnson AA, Johnson KA (2001) Fidelity of nucleotide incorporation by human mitochondrial DNA polymerase. *J Biol Chem* 276: 38090–38096.
2. Johnson AA, Ray AS, Hanes J, Suo Z, Colacino JM, et al. (2001) Toxicity of antiviral nucleoside analogs and the human mitochondrial DNA polymerase. *J Biol Chem* 276: 40847–40857.
3. Wendelsdorf KV, Song Z, Cao Y, Samuels DC (2009) An analysis of enzyme kinetics data for mitochondrial DNA strand termination by nucleoside reverse transcription inhibitors. *PLoS Comput Biol* 5: e1000261.
4. Honkoop P, Scholte HR, de Man RA, Schalm SW (1997) Mitochondrial injury. Lessons from the fialuridine trial. *Drug Saf* 17: 1–7.
